# Supplementary material for: InSAR observations of the 2009 Racha earthquake, Georgia
Source: Copernicus journal article supplement (doi:10.5194/nhess-16-2137-2016), 2016-09-23

Supplement of Nat. Hazards Earth Syst. Sci., 16, 2137–2144, 2016  
<http://www.nat-hazards-earth-syst-sci.net/16/2137/2016/>  
doi:10.5194/nhess-16-2137-2016-supplement  
© Author(s) 2016. CC Attribution 3.0 License.

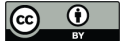

Natural Hazards  
and Earth System  
Sciences  Open Access

*Supplement of*

## **InSAR observations of the 2009 Racha earthquake, Georgia**

**Elena Nikolaeva and Thomas R. Walter**

*Correspondence to:* Elena Nikolaeva (elenanikolaeva@hotmail.com)

The copyright of individual parts of the supplement might differ from the CC-BY 3.0 licence.

**Supplement Figure S1.** Example of the 20090904-20091020 interferogram processing stages: (a) filtered interferogram, (b) unwrapped interferogram, (c) interferogram after orbit correction, (d) Interferogram after topography correlated atmospheric delay. (a), (b), (c) in the satellite azimuth-range coordinates; (d) in the ground coordinates (UTM). The deformation signal is within the white circle.

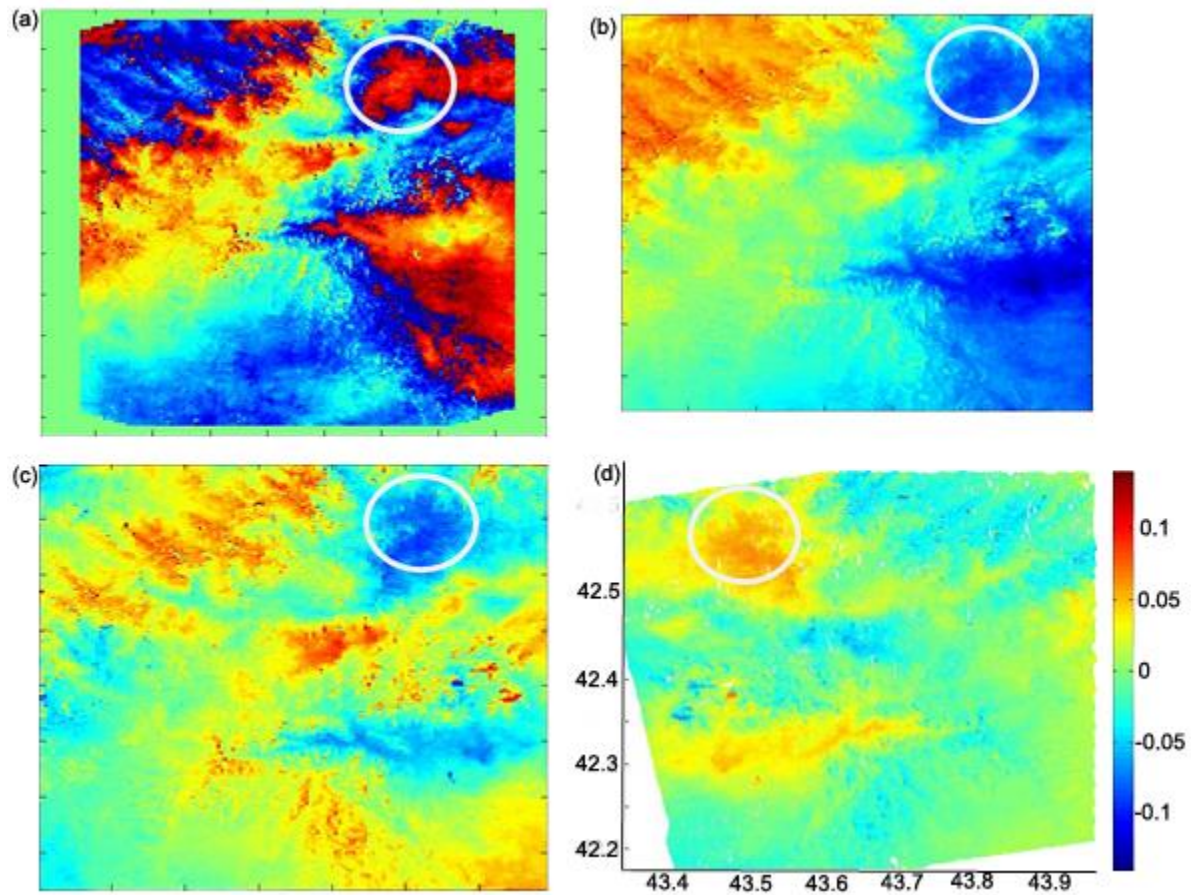

Supplement: Supplementary file 1 [file nhess-16-2137-2016-supplement.pdf]
